# Supplementary material
Source: publisher figshare collection journal article supplement (https://sage.figshare.com/ndownloader/files/23507451)
Supplement: Supplementary file 1 [file 23507451]

## **Supplemental Material**

Supplementary Table 1: Absolute and relative numbers and total number (*n*) of patients who answered the questions of the *NCCN-Distress Thermometer Problem List*

| Problems with         | Yes | %    | No  | %    | <i>n</i> |
|-----------------------|-----|------|-----|------|----------|
| Housing               | 6   | 4.7  | 122 | 95.3 | 128      |
| Insurance             | 5   | 4.0  | 121 | 96.0 | 126      |
| Work                  | 4   | 3.2  | 120 | 96.8 | 124      |
| Transportation        | 7   | 5.6  | 118 | 94.4 | 125      |
| Child care            | 3   | 2.5  | 119 | 97.5 | 122      |
| Financial worries     | 11  | 8.7  | 115 | 91.3 | 126      |
| Family health issues  | 5   | 4.0  | 120 | 96.0 | 125      |
| Dealing with partner  | 14  | 10.9 | 114 | 89.1 | 128      |
| Dealing with children | 5   | 4.0  | 119 | 96.0 | 124      |
| Worry                 | 59  | 47.6 | 65  | 52.4 | 124      |
| Fears                 | 77  | 60.6 | 50  | 39.4 | 127      |
| Sadness               | 33  | 27.1 | 89  | 73.0 | 122      |
| Depression            | 21  | 16.7 | 105 | 83.3 | 126      |
| Nervousness           | 27  | 21.4 | 99  | 78.6 | 126      |

|                                      |    |      |     |      |     |
|--------------------------------------|----|------|-----|------|-----|
| Loss of interest in usual activities | 27 | 21.6 | 98  | 78.4 | 125 |
| Spiritual/religious concerns         | 10 | 8.0  | 115 | 92.0 | 125 |
| Contact with children                | 8  | 6.5  | 115 | 93.5 | 123 |
| Pain                                 | 37 | 29.8 | 87  | 70.2 | 124 |
| Nausea                               | 7  | 5.7  | 117 | 94.4 | 124 |
| Fatigue                              | 38 | 31.7 | 82  | 68.3 | 120 |
| Sleep                                | 53 | 42.4 | 72  | 57.6 | 125 |
| Getting around                       | 40 | 32.5 | 83  | 67.5 | 123 |
| Bathing/dressing                     | 18 | 14.5 | 106 | 85.5 | 124 |
| Appearance                           | 10 | 8.2  | 112 | 91.8 | 122 |
| Breathing                            | 12 | 9.7  | 112 | 90.3 | 124 |
| Stomatitis                           | 5  | 4.1  | 118 | 95.9 | 123 |
| Eating                               | 11 | 8.9  | 112 | 91.1 | 123 |
| Digestion                            | 22 | 17.7 | 102 | 82.3 | 124 |
| Constipation                         | 25 | 20.2 | 99  | 79.8 | 124 |
| Diarrhea                             | 14 | 11.7 | 106 | 88.3 | 120 |
| Changes in urination                 | 57 | 46.0 | 67  | 54.0 | 124 |

|                        |    |      |     |      |     |
|------------------------|----|------|-----|------|-----|
| Fevers                 | 4  | 3.3  | 119 | 96.8 | 123 |
| Skin dry/itchy         | 30 | 24.2 | 94  | 75.8 | 124 |
| Nose dry/congested     | 20 | 16.3 | 103 | 83.7 | 123 |
| Tingling in hands/feet | 22 | 17.9 | 101 | 82.1 | 123 |
| Feeling swollen        | 20 | 16.1 | 104 | 83.9 | 124 |
| Memory/concentration   | 26 | 21.0 | 98  | 79.0 | 124 |
| Erectile dysfunction   | 84 | 71.2 | 34  | 28.8 | 118 |
| Other sexual issues    | 31 | 27.2 | 83  | 72.8 | 114 |
| Urinal Incontinence    | 43 | 36.1 | 76  | 63.9 | 119 |

Supplementary Table 2: Answers (%) to the question “What/Who helps you in coping with the current situation?” and number of patients (*n*)

|                                                 | Not at all<br>helpful | Slightly<br>helpful | Fairly<br>helpful | Very<br>helpful' | <i>n</i> |
|-------------------------------------------------|-----------------------|---------------------|-------------------|------------------|----------|
| Partner                                         | 4.2                   | 4.2                 | 10.8              | 80.8             | 120      |
| Children                                        | 14.1                  | 8.1                 | 24.2              | 53.6             | 99       |
| Friends                                         | 20.7                  | 16.3                | 39.1              | 23.9             | 92       |
| Job                                             | 58.3                  | 6.9                 | 18.1              | 16.7             | 72       |
| Physical activity                               | 7.0                   | 14.0                | 31.0              | 48.0             | 100      |
| Meditation, yoga                                | 70.7                  | 10.7                | 9.3               | 9.3              | 75       |
| Hobbies                                         | 12.3                  | 9.0                 | 47.2              | 31.5             | 89       |
| Religion                                        | 31.7                  | 13.4                | 20.7              | 34.2             | 82       |
| Positive attitude                               | 3.6                   | 5.5                 | 27.3              | 63.6             | 110      |
| Positive experiences with<br>medical treatments | 4.9                   | 9.7                 | 42.7              | 42.7             | 103      |

Supplementary Table 3: Self-constructed questionnaire

**1. Have you been informed about psychological counseling or assistance regarding your illness?**

- ☐ yes  
☐ no  
☐ I don't know

**2. Have you ever made use of support regarding your emotional and social needs? If so, has the support been helpful to you?**

Please judge each statement. If you have made use of one or more support or counseling services ("yes"), please assess how helpful the respective support was for you. If "no", please proceed to the next statement or line.

|                                                                                                 | made use of           |                         | If „yes“ →<br>Was the support helpful for you? |                         |                         |                         |                         |
|-------------------------------------------------------------------------------------------------|-----------------------|-------------------------|------------------------------------------------|-------------------------|-------------------------|-------------------------|-------------------------|
|                                                                                                 | no                    | yes →                   | not at all                                     | slightly                | some                    | fairly                  | very much               |
| 1. Psychotherapy                                                                                | <input type="radio"/> | <input type="radio"/> → | 1 <input type="radio"/>                        | 2 <input type="radio"/> | 3 <input type="radio"/> | 4 <input type="radio"/> | 5 <input type="radio"/> |
| 2. Psychological counseling/support                                                             | <input type="radio"/> | <input type="radio"/> → | 1 <input type="radio"/>                        | 2 <input type="radio"/> | 3 <input type="radio"/> | 4 <input type="radio"/> | 5 <input type="radio"/> |
| 3. Social law counseling/support                                                                | <input type="radio"/> | <input type="radio"/> → | 1 <input type="radio"/>                        | 2 <input type="radio"/> | 3 <input type="radio"/> | 4 <input type="radio"/> | 5 <input type="radio"/> |
| 4. Spiritual support                                                                            | <input type="radio"/> | <input type="radio"/> → | 1 <input type="radio"/>                        | 2 <input type="radio"/> | 3 <input type="radio"/> | 4 <input type="radio"/> | 5 <input type="radio"/> |
| 5. Self-help group                                                                              | <input type="radio"/> | <input type="radio"/> → | 1 <input type="radio"/>                        | 2 <input type="radio"/> | 3 <input type="radio"/> | 4 <input type="radio"/> | 5 <input type="radio"/> |
| 6. Support from cancer counseling center                                                        | <input type="radio"/> | <input type="radio"/> → | 1 <input type="radio"/>                        | 2 <input type="radio"/> | 3 <input type="radio"/> | 4 <input type="radio"/> | 5 <input type="radio"/> |
| 7. Telephone consultation by experts                                                            | <input type="radio"/> | <input type="radio"/> → | 1 <input type="radio"/>                        | 2 <input type="radio"/> | 3 <input type="radio"/> | 4 <input type="radio"/> | 5 <input type="radio"/> |
| 8. Internet consultation by experts                                                             | <input type="radio"/> | <input type="radio"/> → | 1 <input type="radio"/>                        | 2 <input type="radio"/> | 3 <input type="radio"/> | 4 <input type="radio"/> | 5 <input type="radio"/> |
| 9. Internet forum with people concerned                                                         | <input type="radio"/> | <input type="radio"/> → | 1 <input type="radio"/>                        | 2 <input type="radio"/> | 3 <input type="radio"/> | 4 <input type="radio"/> | 5 <input type="radio"/> |
| 10. Others:  | <input type="radio"/> | <input type="radio"/> → | 1 <input type="radio"/>                        | 2 <input type="radio"/> | 3 <input type="radio"/> | 4 <input type="radio"/> | 5 <input type="radio"/> |
| <hr/>                                                                                           |                       |                         |                                                |                         |                         |                         |                         |

**3. Where have you made use of psychosocial support?**

(Several answer options can be selected.)

- ☐ At the hospital ☐ I have not used psychosocial support  
☐ During rehabilitation  
☐ In an outpatient setting  
☐ Others:  \_\_\_\_\_

**4. Do you wish for psychosocial support?**

- a. ☐ I use or have already made use of an offer/offers and would like...
- ☐ further support ☐ no further support
- 
- b. ☐ I have not already made use of an offer/offers and would like ...
- ☐ support ☐ no support

**5. If you did not make use of psychosocial support due to your cancer diagnosis, what are the reasons?**

(Several answer options can be selected.)

- ☐ I do not need support
- ☐ I don't know where to turn in this matter
- ☐ I didn't know such offers existed
- ☐ Others:  \_\_\_\_\_

**6. In which areas/questions would you like additional support at present?**

(Several answer options can be selected.)

- ☐ in the medical and health sector (e.g. physical complaints and side effects)
- ☐ psychological support (e.g. in case of concerns and in coping with illness)
- ☐ in family matters (e.g. how do I explain the situation to people close to me)
- ☐ in the social sector (e.g. in case of work-related problems or insurance law issues)
- ☐ in the pastoral area (e.g. in religious matters)
- ☐ Others:  \_\_\_\_\_

**7. Which topics are currently troubling you most?**

(Several answer options can be selected.)

|                                                                                                                    | no                    | yes                   |
|--------------------------------------------------------------------------------------------------------------------|-----------------------|-----------------------|
| 1. Fear of the future                                                                                              | <input type="radio"/> | <input type="radio"/> |
| 2. Progression anxiety                                                                                             | <input type="radio"/> | <input type="radio"/> |
| 3. Burden on the partner                                                                                           | <input type="radio"/> | <input type="radio"/> |
| 4. Burden on other family members                                                                                  | <input type="radio"/> | <input type="radio"/> |
| 5. Job                                                                                                             | <input type="radio"/> | <input type="radio"/> |
| 7. Behavior towards friends                                                                                        | <input type="radio"/> | <input type="radio"/> |
| 8. Physical impairments                                                                                            | <input type="radio"/> | <input type="radio"/> |
| 9. Sexuality                                                                                                       | <input type="radio"/> | <input type="radio"/> |
| 10. Other topics or additions:  | <div>_____</div>      |                       |

**8. Who is an important conversation partner for you at the moment? (Several answer options can be selected)**

- |                                                    |                                                                                                                           |
|----------------------------------------------------|---------------------------------------------------------------------------------------------------------------------------|
| <input type="radio"/> Doctors                      | <input type="radio"/> Friends                                                                                             |
| <input type="radio"/> Nursing staff                | <input type="radio"/> Persons concerned                                                                                   |
| <input type="radio"/> Psychologist/Psychotherapist | <input type="radio"/> Self help group members                                                                             |
| <input type="radio"/> Chaplain                     | <input type="radio"/> Nobody                                                                                              |
| <input type="radio"/> Social Services              | <input type="radio"/> Others, namely:  |
| <input type="radio"/> Family members               | _____                                                                                                                     |

**9. What/Who helps you in coping with the current situation?**

|                                                                                                      | not at all              | slightly helpful        | fairly helpful          | very helpful            |
|------------------------------------------------------------------------------------------------------|-------------------------|-------------------------|-------------------------|-------------------------|
| 1. Partner                                                                                           | 1 <input type="radio"/> | 2 <input type="radio"/> | 3 <input type="radio"/> | 4 <input type="radio"/> |
| 2. Children                                                                                          | 1 <input type="radio"/> | 2 <input type="radio"/> | 3 <input type="radio"/> | 4 <input type="radio"/> |
| 3. Friends                                                                                           | 1 <input type="radio"/> | 2 <input type="radio"/> | 3 <input type="radio"/> | 4 <input type="radio"/> |
| 4. Job                                                                                               | 1 <input type="radio"/> | 2 <input type="radio"/> | 3 <input type="radio"/> | 4 <input type="radio"/> |
| 5. Physical activity                                                                                 | 1 <input type="radio"/> | 2 <input type="radio"/> | 3 <input type="radio"/> | 4 <input type="radio"/> |
| 6. Meditation, yoga, e.g.                                                                            | 1 <input type="radio"/> | 2 <input type="radio"/> | 3 <input type="radio"/> | 4 <input type="radio"/> |
| 7. Hobbies                                                                                           | 1 <input type="radio"/> | 2 <input type="radio"/> | 3 <input type="radio"/> | 4 <input type="radio"/> |
| 8. Belief/religion                                                                                   | 1 <input type="radio"/> | 2 <input type="radio"/> | 3 <input type="radio"/> | 4 <input type="radio"/> |
| 9. Positive attitude                                                                                 | 1 <input type="radio"/> | 2 <input type="radio"/> | 3 <input type="radio"/> | 4 <input type="radio"/> |
| 10. Positive experiences with medical treatments                                                     | 1 <input type="radio"/> | 2 <input type="radio"/> | 3 <input type="radio"/> | 4 <input type="radio"/> |
| 11. Other areas:  | 1 <input type="radio"/> | 2 <input type="radio"/> | 3 <input type="radio"/> | 4 <input type="radio"/> |
| _____                                                                                                |                         |                         |                         |                         |
